# Supplementary material
Source: PubMed Central journal article supplement (PMC4423368)
Supplement: 10.1534_115.174912_genetics.115.174912-6.pdf [file 10.1534_115.174912_genetics.115.174912-6.pdf]

Figure S3

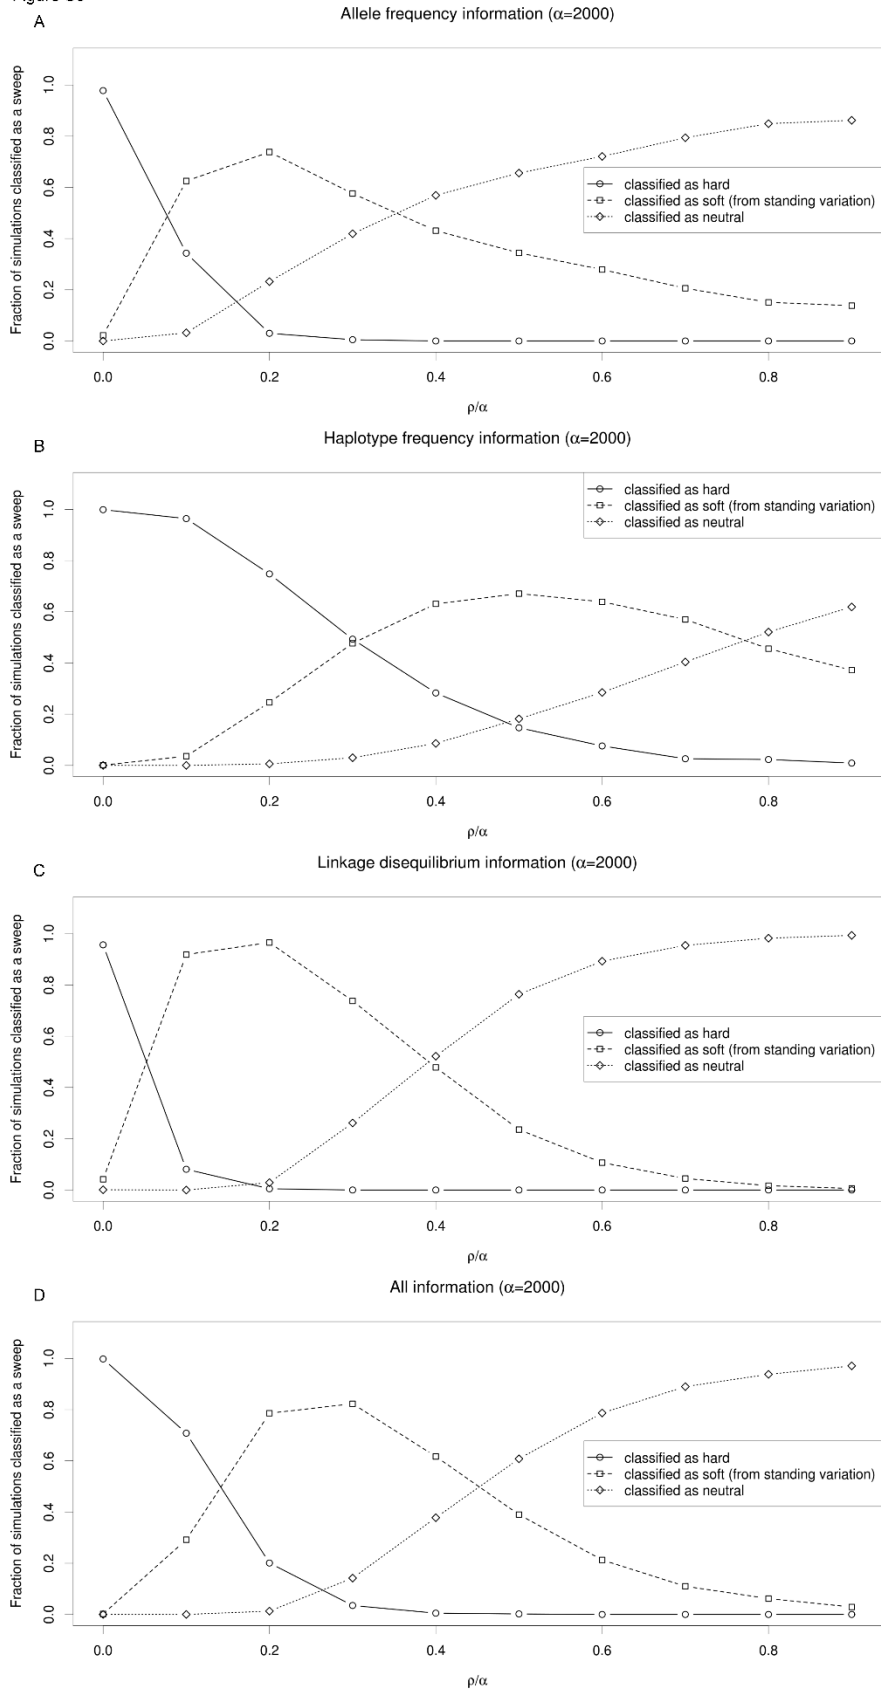

Figure S3 Classification of regions flanking hard sweeps with  $\alpha=2000$ . This is the same plot as Figure 1 but with both  $\alpha$  and  $\rho$  set to 2000.
