# Supplementary material
Source: PubMed Central journal article supplement (PMC4423368)
Supplement: 10.1534_115.174912_genetics.115.174912-7.pdf [file 10.1534_115.174912_genetics.115.174912-7.pdf]

Figure S2

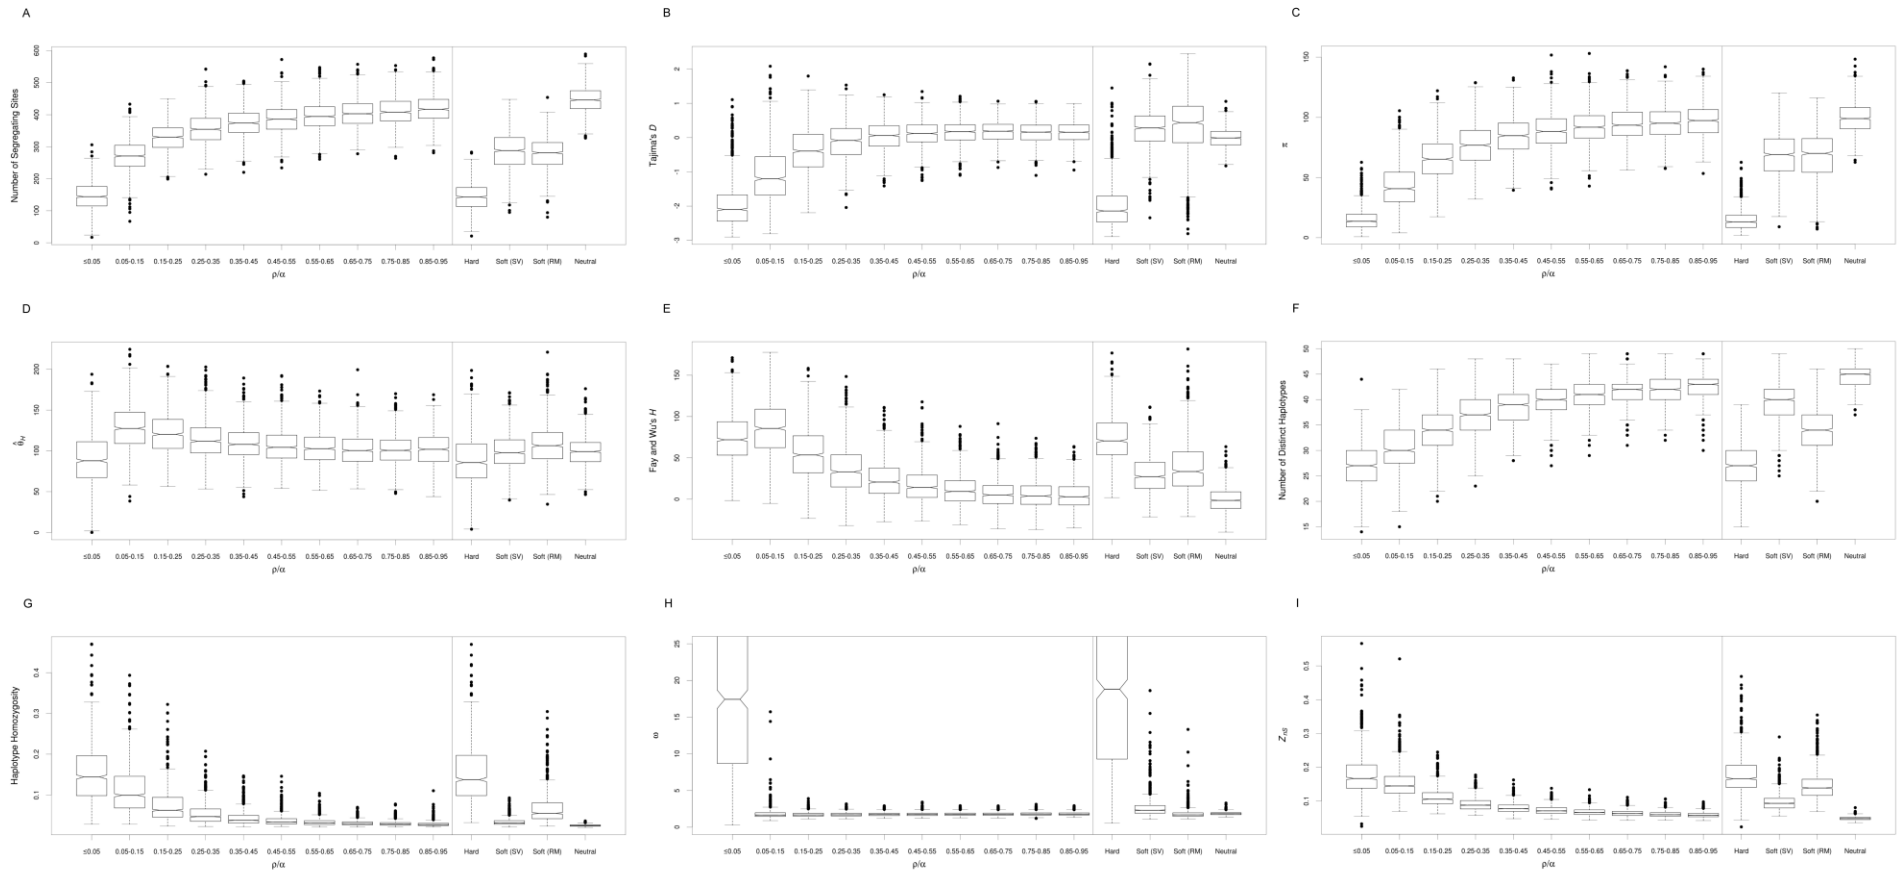

Figure S2 Distributions of additional summary statistics in neutral, selected, and linked regions.
