# Supplementary material
Source: PubMed Central journal article supplement (PMC4423368)
Supplement: 10.1534_115.174912_genetics.115.174912-9.pdf [file 10.1534_115.174912_genetics.115.174912-9.pdf]

Figure S5

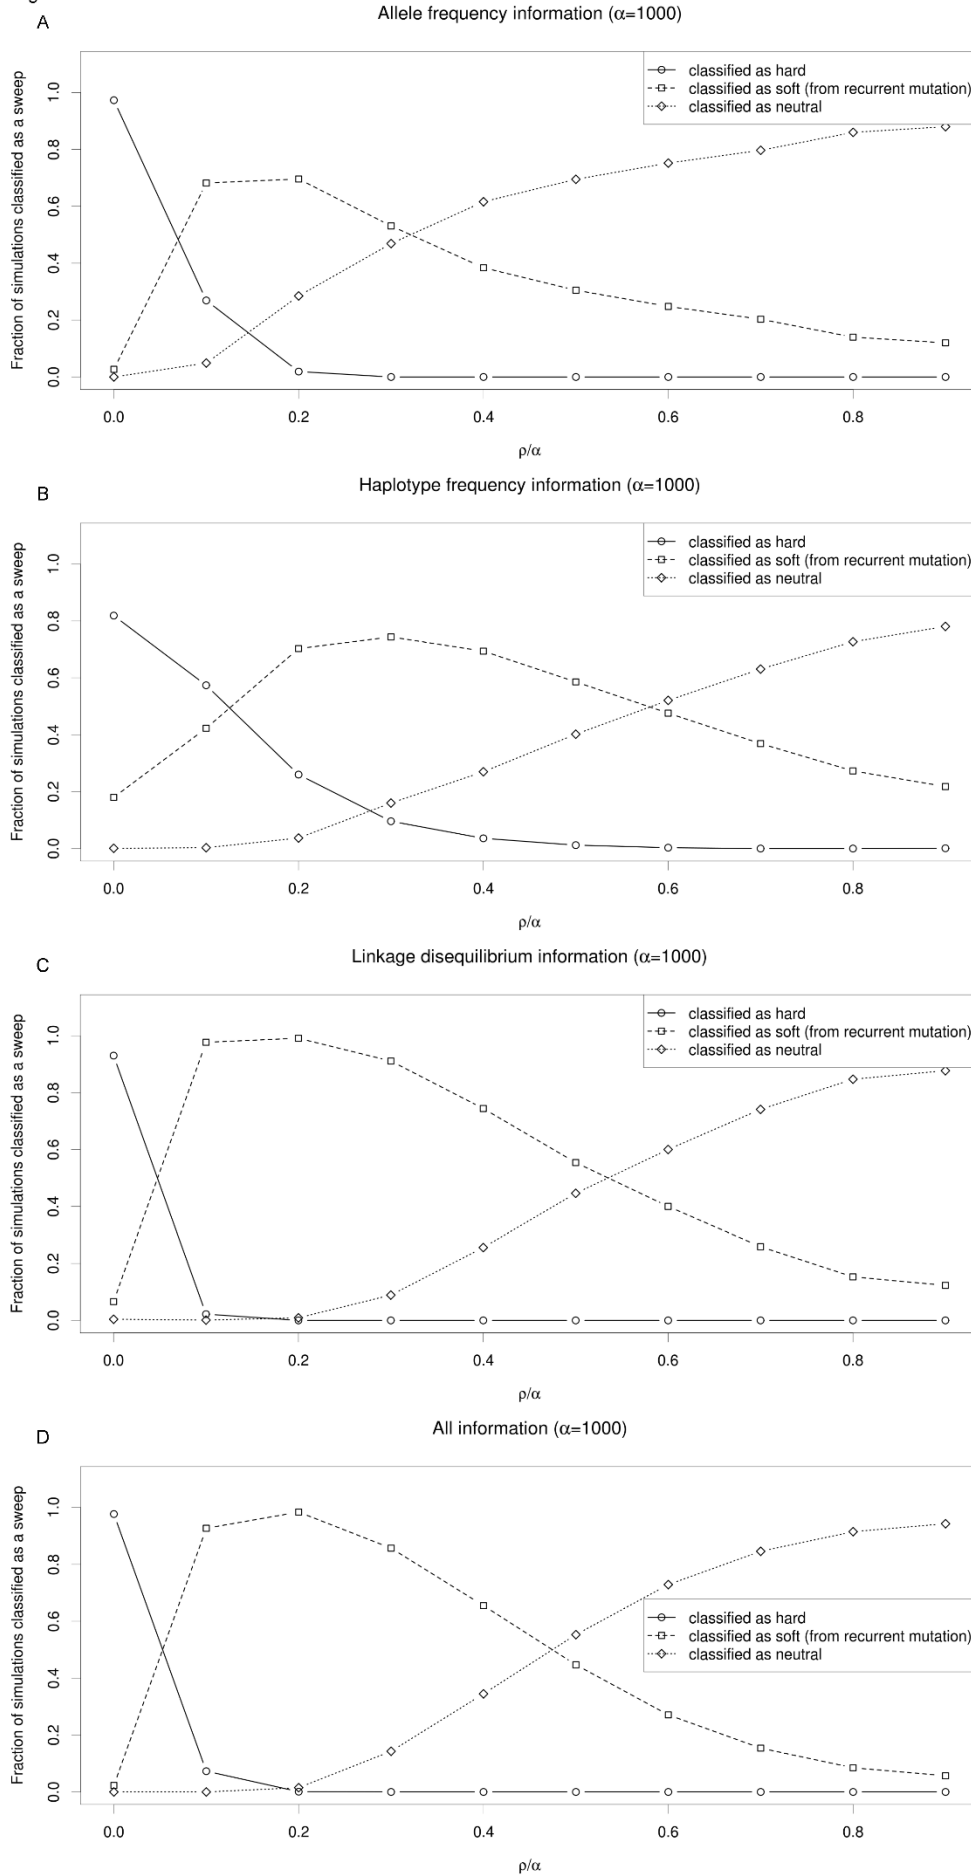

**Figure S5 Classification of regions flanking hard sweeps with  $\alpha=1000$ , but considering recurrent mutation.** This is the same plot as Figure 1 but the model of soft sweeps considered is one where the adaptive mutation can reoccur on multiple genetic backgrounds during the sweep.
