# Supplementary material
Source: PubMed Central journal article supplement (PMC4423368)
Supplement: 10.1534_115.174912_genetics.115.174912-10.pdf [file 10.1534_115.174912_genetics.115.174912-10.pdf]

Figure S1

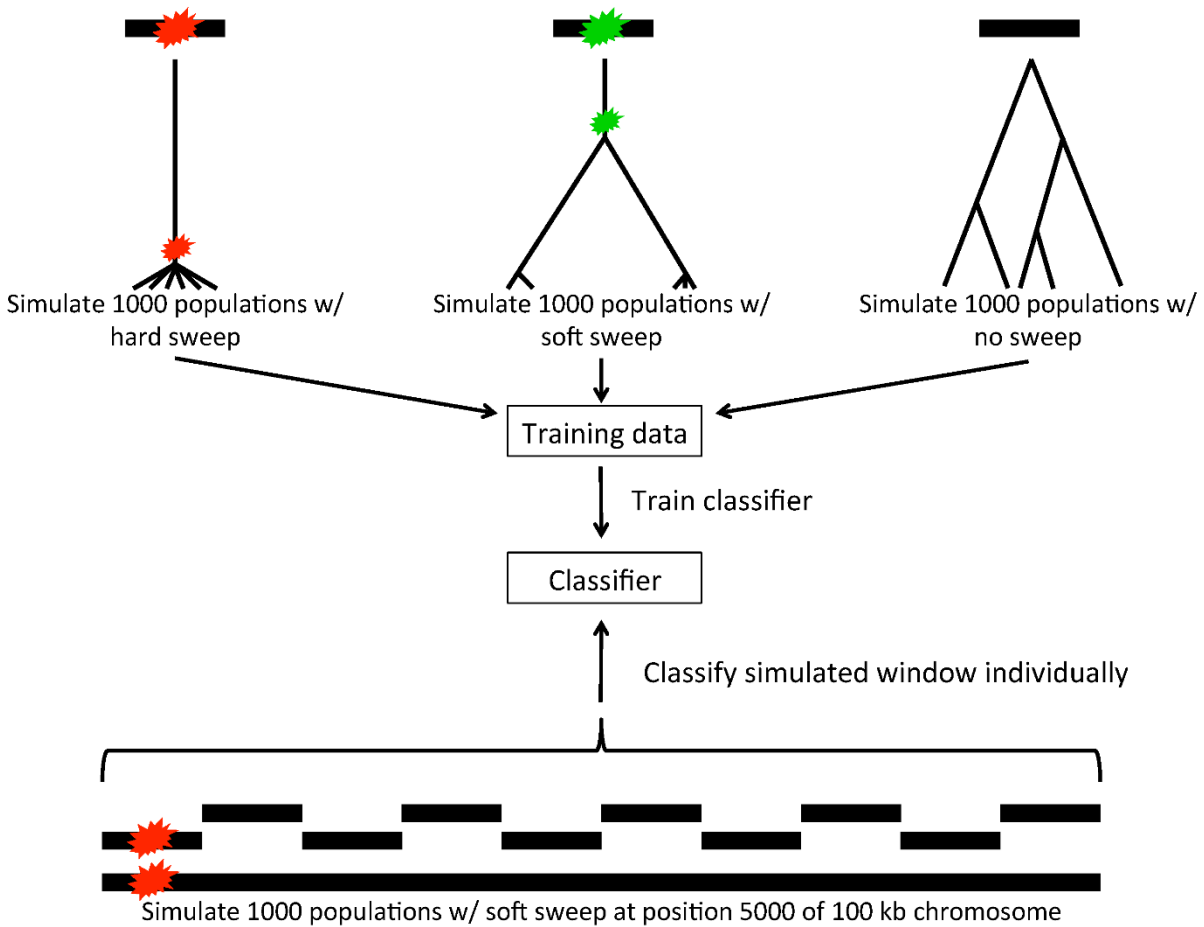

**Figure S1 Strategy for classifying genomic windows as hard sweeps, soft sweeps, or evolving neutrally.** Diagram of evolutionary scenarios of simulated 10 kb chromosomes used to train the classifier, and 100 kb chromosomes which are segmented into 10 kb windows (the first of which contains a hard sweep) to which the classifier was applied. Example genealogies of each evolutionary scenario are shown, as well as the time at which mutations that result in a sweep (hard or soft) occur. Mutations that begin sweeping to fixation immediately upon occurrence are denoted by a red explosion, while mutations that are initially fitness-neutral but later sweep to fixation are denoted by a green explosion.
