# Supplementary material
Source: PubMed Central journal article supplement (PMC4423368)
Supplement: 10.1534_115.174912_genetics.115.174912-11.pdf [file 10.1534_115.174912_genetics.115.174912-11.pdf]

Figure S8

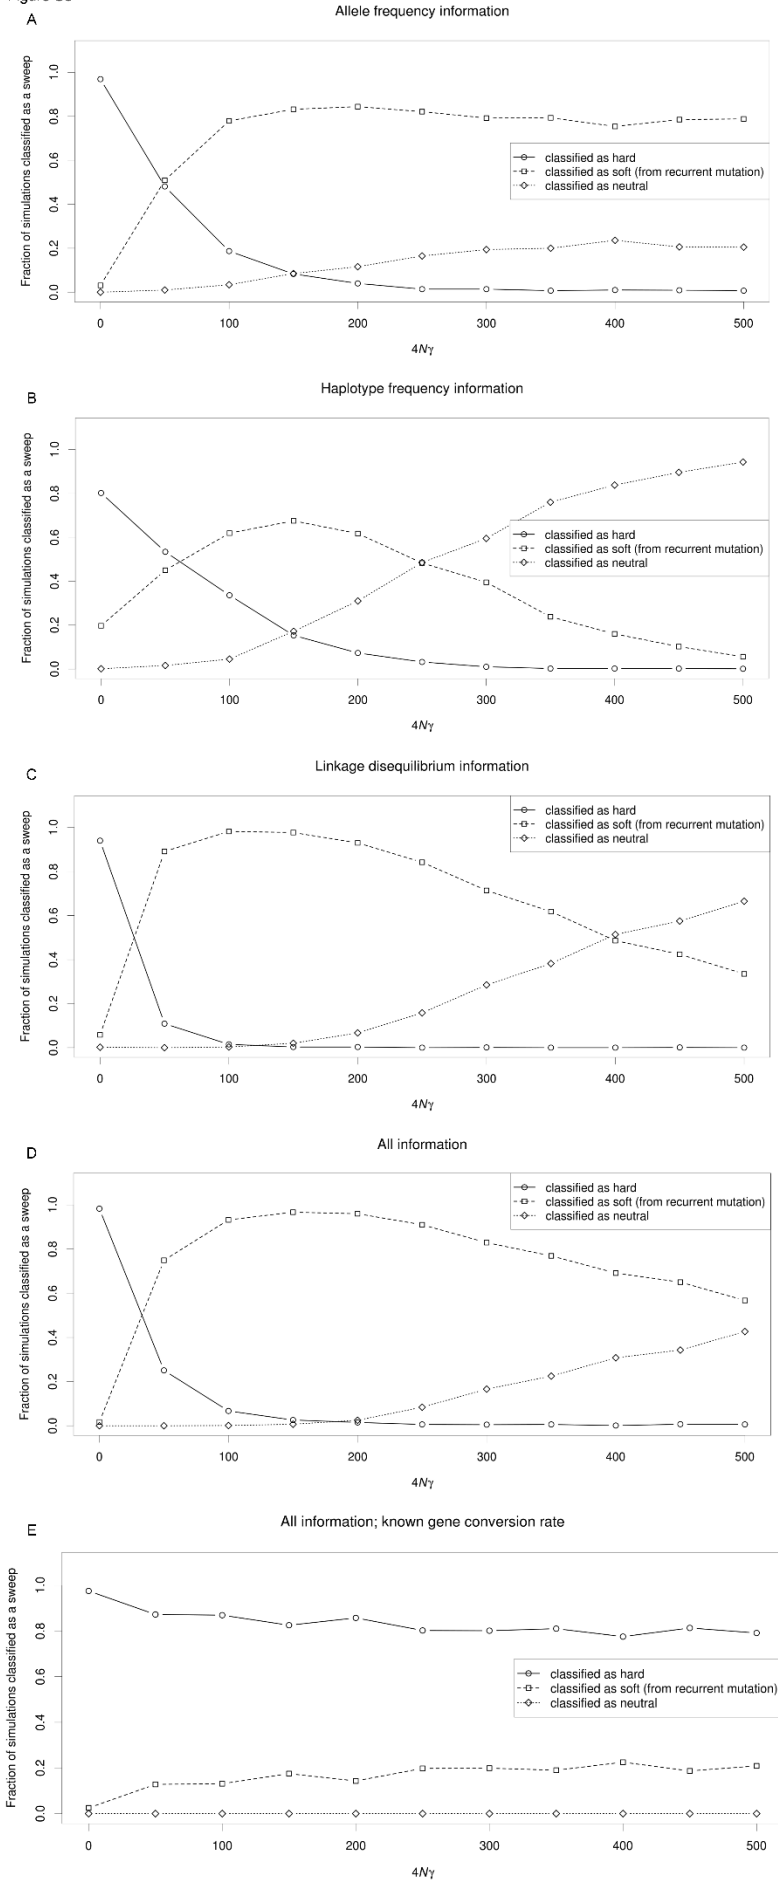

**Figure S8 The relationship between gene conversion rate and sweep misclassification rate when modeling soft sweeps from recurrent adaptive mutation.** (A) The relationship between the locus-wide gene-conversion rate and the fraction of simulated windows containing a hard sweep ( $\alpha=1000$ ) classified as hard, soft (from recurrent mutation), or neutral. (B) Same as panel A, but using a classifier leveraging haplotype information. (C) Results from an SVM leveraging LD information. (D) An SVM leveraging our full set of summary statistics (Methods). (E) An SVM leveraging our full set of summary statistics and trained from simulated regions experiencing the correct gene conversion rate.
